# Supplementary material for: Drought stress modify cuticle of tender tea leaf and mature leaf for transpiration barrier enhancement through common and distinct modes
Source: PubMed Central journal article supplement (PMC7174317; doi:10.1038/s41598-020-63683-4), 2020-04-21

# **Drought stress modify cuticle of tender tea leaf and mature leaf for transpiration barrier enhancement through common and distinct modes**

**Mingjie Chen<sup>1,3\*#</sup>, Xiaofang Zhu<sup>2,3#</sup>, Yi Zhang<sup>3</sup>, Zhenghua Du<sup>3</sup>, Xiaobing Chen<sup>3</sup>, Xiangrui Kong<sup>2</sup>, Weijiang Sun<sup>4</sup>, Changsong Chen<sup>2\*</sup>**

<sup>1</sup>Henan Key Laboratory of Tea Plant Biology, College of Life Sciences, Xinyang Normal University, Xinyang 464000, China

<sup>2</sup>Tea Research Institute, Fujian Academy of Agricultural Sciences, Fuan, Fujian 355000, China

<sup>3</sup>Horticultural Plant Biology and Metabolomics Center, Haixia Institute of Science and Technology, Fujian Agriculture and Forestry University, Fuzhou, Fujian 350002, China

<sup>4</sup>Anxi College of Tea Science, Fujian Agriculture and Forestry University, Fuzhou, Fujian 350002, China

\*Correspondence authors:

Email: [mjchen@xynu.edu.cn](mailto:mjchen@xynu.edu.cn); [ccs6536597@163.com](mailto:ccs6536597@163.com)

**Figure S1.** Chain length distributions of esters and glycols during the course of drought treatment. D-1, D-8, and D-15 represent the first day, the eighth day, and the fifteenth day of water deprivation, respectively; D-15C: the well-watered control plants at day 15. \* indicates D-8 or D-15 was statistically significant compared with D-1 ( $p < 0.05$ ); + indicates D-15 was statistically significant compared with D-8 ( $p < 0.05$ ).

**Figure S2.** Chain length distributions of terpenoids during the course of drought treatment. D-1, D-8, and D-15 represent the first day, the eighth day, and the fifteenth day of water deprivation, respectively; D-15C: the well-watered control plants at day 15. \* indicates D-8 or D-15 was statistically significant compared with D-1 ( $p < 0.05$ ); + indicates D-15 was statistically significant compared with D-8 ( $p < 0.05$ ).

**Figure S3** Diagram presentation of the drought treatment. D-1, D-8 and D-15 represent the first day, the eighth day and the fifteenth day of water deprivation, respectively; D-15C: the fifteenth day of well-watered control plants.

**Figure S4** Greenhouse temperature and humidity changes during water-deprivation treatment. 1d, 8d and 15d represent the first day, the eighth day and the fifteenth day of water deprivation, respectively.

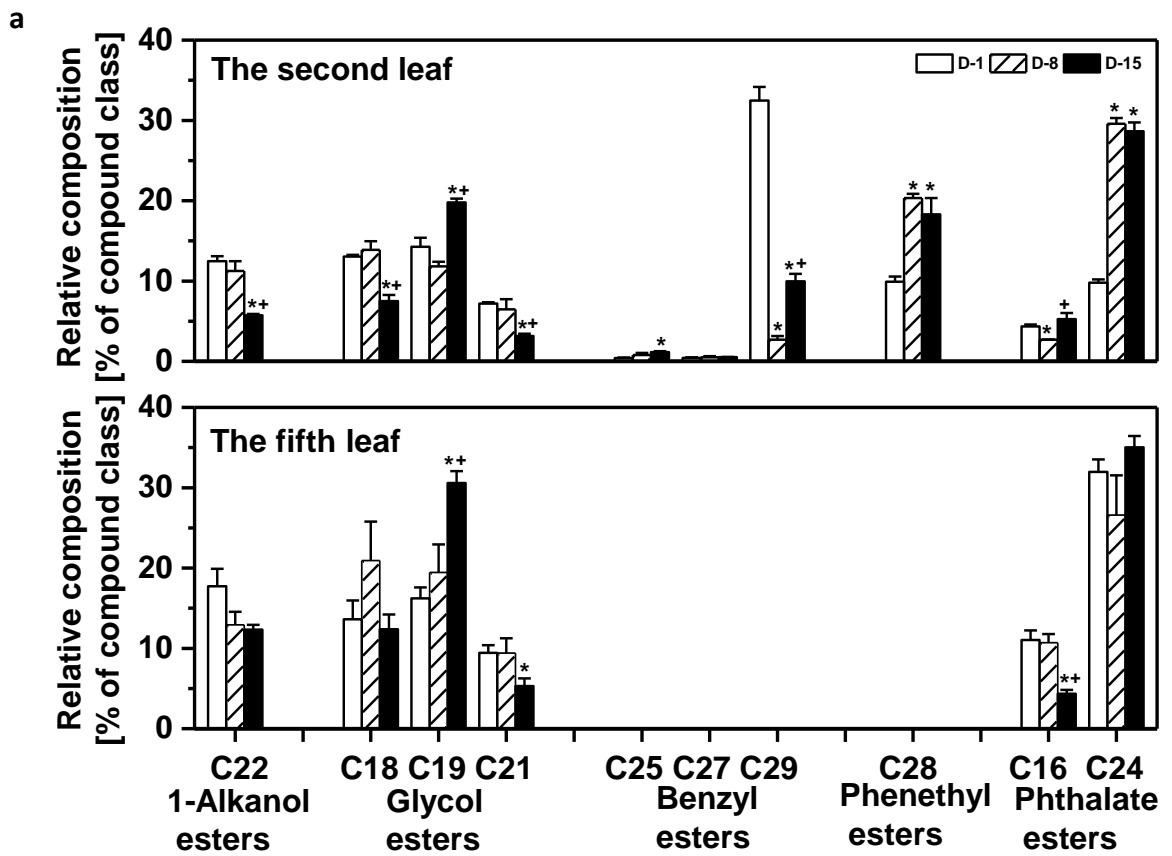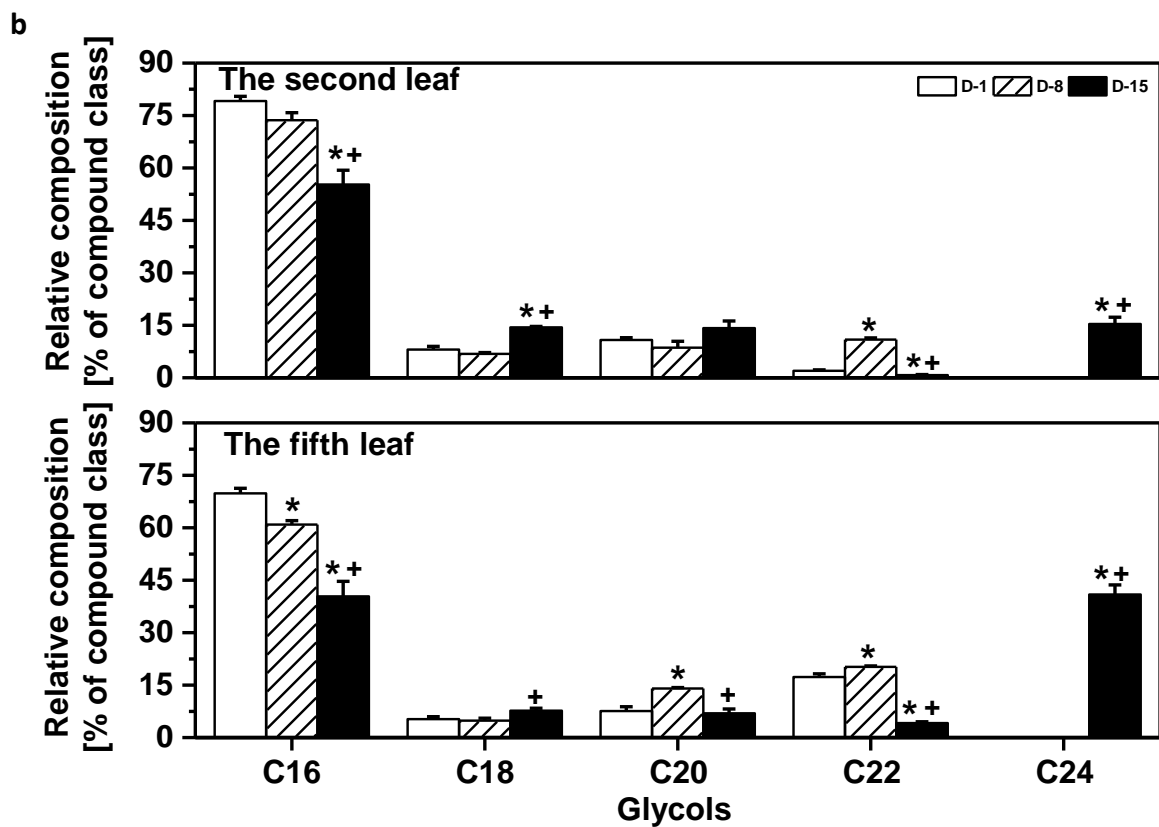

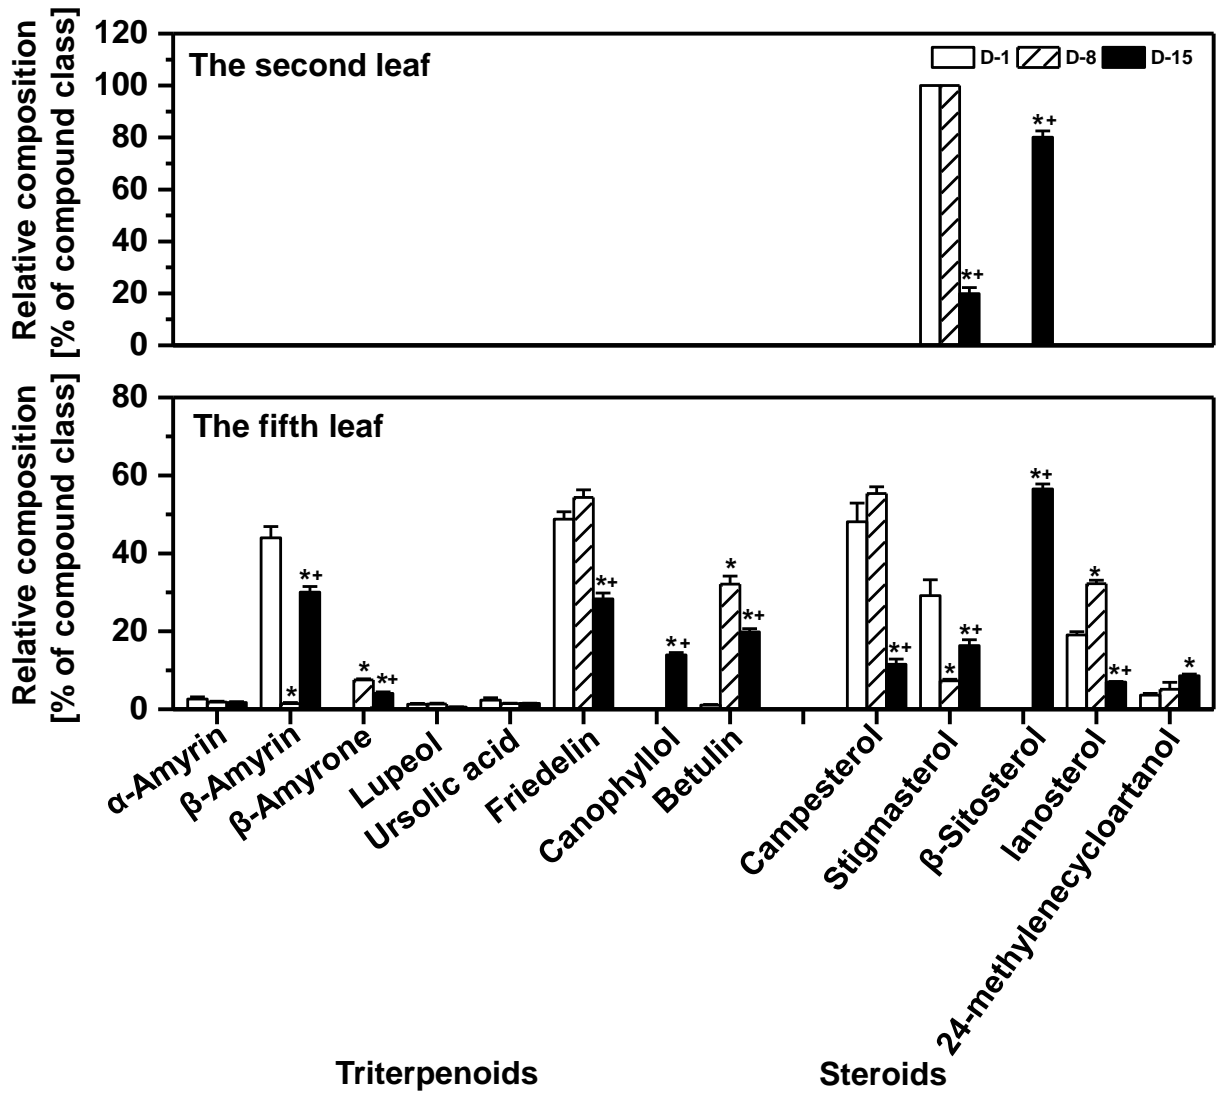

# Supplementary information

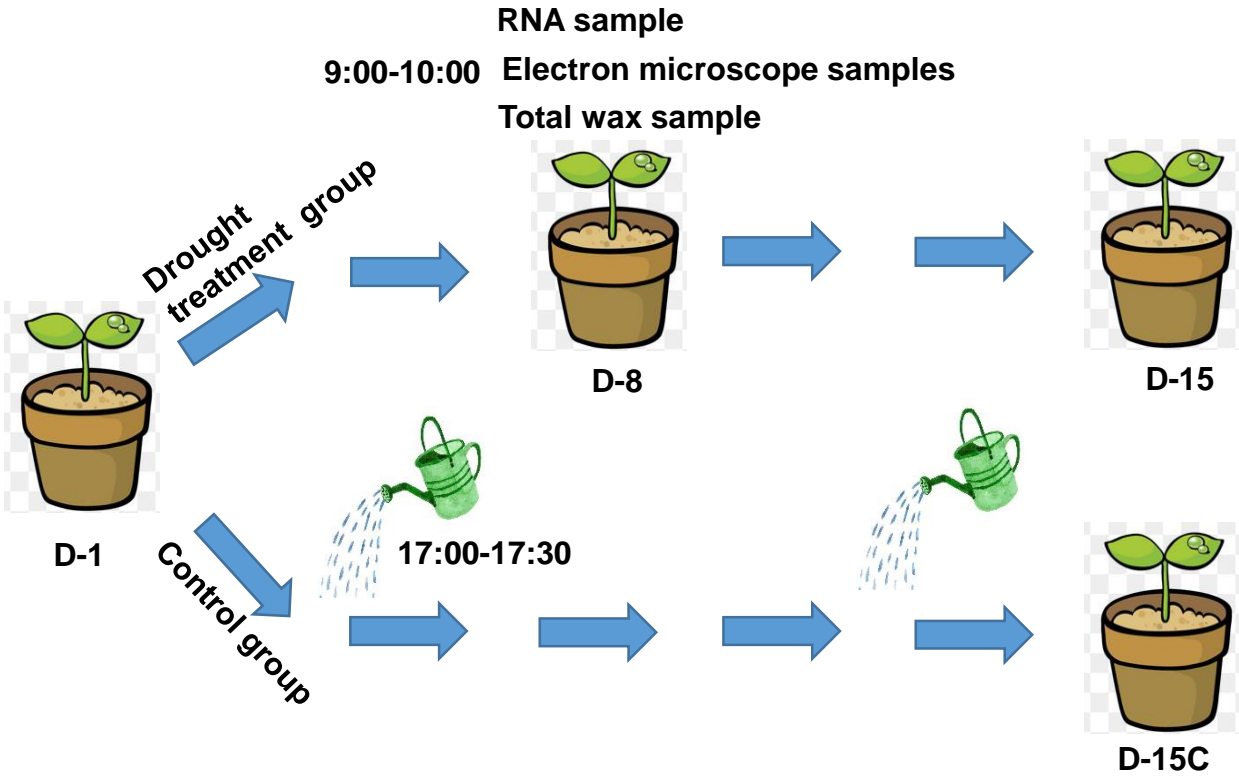

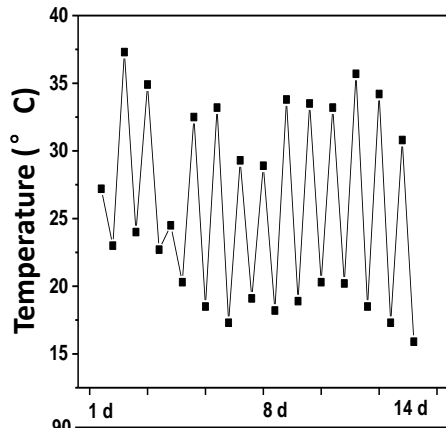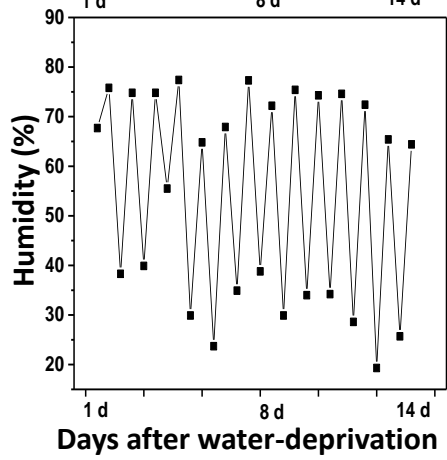

Supplement: 41598_2020_63683_MOESM1_ESM.pdf [file 41598_2020_63683_MOESM1_ESM.pdf]
