# Supplementary material for: Drought stress modify cuticle of tender tea leaf and mature leaf for transpiration barrier enhancement through common and distinct modes
Source: PubMed Central journal article supplement (PMC7174317; doi:10.1038/s41598-020-63683-4), 2020-04-21
Supplement: 41598_2020_63683_MOESM2_ESM.pdf [file 41598_2020_63683_MOESM2_ESM.pdf]

## Drought stress modify cuticle of tender tea leaf and mature leaf for transpiration barrier enhancement through common and distinct modes

Mingjie Chen<sup>1,3\*#</sup>, Xiaofang Zhu<sup>2,3#</sup>, Yi Zhang<sup>3</sup>, Zhenghua Du<sup>3</sup>, Xiaobing Chen<sup>3</sup>, Xiangrui Kong<sup>2</sup>, Weijiang Sun<sup>4</sup>, Changsong Chen<sup>2\*</sup>

<sup>1</sup>Henan Key Laboratory of Tea Plant Biology, College of Life Sciences, Xinyang Normal University, Xinyang 464000, China

<sup>2</sup>Tea Research Institute, Fujian Academy of Agricultural Sciences, Fuan, Fujian 355000, China

<sup>3</sup>Horticultural Plant Biology and Metabolomics Center, Haixia Institute of Science and Technology, Fujian Agriculture and Forestry University, Fuzhou, Fujian 350002, China

<sup>4</sup>Anxi College of Tea Science, Fujian Agriculture and Forestry University, Fuzhou, Fujian 350002, China

\*Correspondence authors:

Email: [mjchen@xynu.edu.cn](mailto:mjchen@xynu.edu.cn); [ccs6536597@163.com](mailto:ccs6536597@163.com)

| The second leaf   |  |                 |                                      |                    |                                      |                    |                                      |                    |                    |                    |                    |
|-------------------|--|-----------------|--------------------------------------|--------------------|--------------------------------------|--------------------|--------------------------------------|--------------------|--------------------|--------------------|--------------------|
|                   |  |                 | D-1                                  |                    | D-8                                  |                    | D-15                                 |                    |                    |                    |                    |
|                   |  |                 | Average( $\mu\text{g}/\text{cm}^2$ ) | SE                 | Average( $\mu\text{g}/\text{cm}^2$ ) | SE                 | Average( $\mu\text{g}/\text{cm}^2$ ) | SE                 | p (D-8 vs D1)      | p (D-15 vs D-1)    | p (D-15 vs D-8)    |
| <b>Acids</b>      |  | C16             | 0.051703991                          | 0.005414175        | 0.04492746                           | 0.009867689        | 0.10689775                           | 0.003240289        | 0.579591648        | 0.00094127         | 0.003962595        |
|                   |  | C18             | 0.061709719                          | 0.002238867        | 0.061434348                          | 0.003578876        | 0.106808017                          | 0.004672102        | 0.951120089        | 0.000959036        | 0.001523378        |
|                   |  | C20             | ND                                   | ND                 | ND                                   | ND                 | 0.030792614                          | 0.002876445        | ND                 | 0.000867376        | 0.000867376        |
|                   |  | C22             | 0.006976454                          | 0.001095768        | 0.011859825                          | 0.002704231        | 0.022780266                          | 0.002549337        | 0.169514069        | 0.001502834        | 0.008676464        |
|                   |  | C24             | 0.009172235                          | 0.001090299        | 0.007547967                          | 0.002169889        | 0.018296413                          | 0.001023001        | 0.540206192        | 0.003647896        | 0.010985772        |
|                   |  | C26             | 0.027798663                          | 0.003389037        | 0.016995613                          | 0.006911889        | 0.034163704                          | 0.002216189        | 0.233174979        | 0.191079276        | 0.077220237        |
|                   |  | C28             | 0.067847125                          | 0.007240988        | 0.019141843                          | 0.001848627        | 0.040619389                          | 0.004474323        | 0.002861653        | 0.032938277        | 0.011365287        |
|                   |  | C30             | 0.031701972                          | 0.00258749         | 0.023881455                          | 0.003817574        | 0.043466944                          | 0.004705608        | 0.165175382        | 0.093604919        | 0.03190781         |
|                   |  | <b>Subtotal</b> | <b>0.25691016</b>                    | <b>0.01257994</b>  | <b>0.185788511</b>                   | <b>0.025276409</b> | <b>0.403825098</b>                   | <b>0.005817128</b> | <b>0.065425176</b> | <b>0.000448308</b> | <b>0.001096032</b> |
| <b>1-Alkanols</b> |  | C18             | 0.023585024                          | 0.002125514        | 0.020842528                          | 0.003052777        | 0.0318212                            | 0.002487808        | 0.501871794        | 0.065562565        | 0.049422511        |
|                   |  | C24             | 0.008404569                          | 0.000696101        | 0.04194388                           | 0.005788097        | 0.023019833                          | 0.001246343        | 0.004526598        | 0.000513065        | 0.033019694        |
|                   |  | C26             | 0.028074537                          | 0.003004404        | 0.017250353                          | 0.006387787        | 0.036755004                          | 0.000762405        | 0.199960008        | 0.048787433        | 0.038707972        |
|                   |  | C28             | 0.321202831                          | 0.019584329        | 0.237203553                          | 0.045021707        | 0.196583303                          | 0.011140538        | 0.162271603        | 0.00522122         | 0.430571011        |
|                   |  | C30             | 0.440376551                          | 0.007913174        | 0.771365329                          | 0.023365458        | 0.309910872                          | 0.0389395          | 0.000178482        | 0.030404538        | 0.000528175        |
|                   |  | C32             | 0.067266921                          | 0.006246782        | 0.078925891                          | 0.014503543        | 0.078447017                          | 0.006201784        | 0.501304258        | 0.272903026        | 0.977235373        |
|                   |  | C34             | 0.014930515                          | 0.002651763        | 0.029336085                          | 0.006441681        | 0.039854914                          | 0.002225008        | 0.107480509        | 0.001971823        | 0.197595144        |
|                   |  | <b>Subtotal</b> | <b>0.903840947</b>                   | <b>0.025786829</b> | <b>1.196867619</b>                   | <b>0.086917952</b> | <b>0.716392144</b>                   | <b>0.050156293</b> | <b>0.03191314</b>  | <b>0.029276096</b> | <b>0.008724728</b> |
| <b>Aldehydes</b>  |  | C26             | 0.007765739                          | 0.001344007        | 0.014855627                          | 0.001319795        | 0.011398804                          | 0.000395916        | 0.019708747        | 0.060492764        | 0.066144735        |
|                   |  | C28             | ND                                   | ND                 | ND                                   | ND                 | 0.007873944                          | 0.000718423        | ND                 | 0.000393709        | 0.000393709        |
|                   |  | C30             | 0.002287467                          | 0.000341664        | 0.006554824                          | 0.001271392        | 0.00287526                           | 0.000335622        | 0.03163079         | 0.287002351        | 0.04889796         |
|                   |  | <b>Subtotal</b> | <b>0.010053206</b>                   | <b>0.001685052</b> | <b>0.02141045</b>                    | <b>0.002583537</b> | <b>0.022148008</b>                   | <b>0.000434873</b> | <b>0.021165782</b> | <b>0.002251808</b> | <b>0.792272868</b> |
| <b>Alkanes</b>    |  | C17             | ND                                   | ND                 | ND                                   | ND                 | 0.031533189                          | 0.003813761        | ND                 | 0.00116758         | 0.00116758         |
|                   |  | C19             | ND                                   | ND                 | ND                                   | ND                 | 0.04305831                           | 0.006483446        | ND                 | 0.002668072        | 0.002668072        |
|                   |  | C21             | 0.026815015                          | 0.002733052        | 0.037252107                          | 0.003434383        | 0.117756757                          | 0.007281468        | 0.076160148        | 0.000305894        | 0.000562084        |
|                   |  | C25             | 0.026537965                          | 0.001607373        | 0.036104004                          | 0.002964082        | 0.177095275                          | 0.003369396        | 0.047009175        | 2.25877E-06        | 6.11665E-06        |
|                   |  | C27             | 0.014639211                          | 0.002436426        | 0.014024746                          | 0.001757209        | 0.13601354                           | 0.004208138        | 0.847910618        | 1.52924E-05        | 1.16093E-05        |
|                   |  | C29             | 0.069156382                          | 0.002130479        | 0.110444635                          | 0.023594284        | 0.285583705                          | 0.014381391        | 0.156319178        | 0.000118579        | 0.003172599        |
|                   |  | C31             | 0.009124373                          | 0.000387448        | 0.009570985                          | 0.000329188        | 0.107155579                          | 0.003929085        | 0.429301898        | 1.56165E-05        | 1.58182E-05        |
|                   |  | C35             | 0.023967889                          | 0.002459016        | 0.025483204                          | 0.006461339        | 0.091253993                          | 0.005172895        | 0.837236963        | 0.000300367        | 0.001358257        |
|                   |  | C37             | ND                                   | ND                 | ND                                   | ND                 | 0.053556071                          | 0.004080438        | ND                 | 0.00019459         | 0.00019459         |
|                   |  | C39             | ND                                   | ND                 | ND                                   | ND                 | 0.028649165                          | 0.0037192          | ND                 | 0.00152833         | 0.00152833         |
|                   |  | <b>Subtotal</b> | <b>0.170240835</b>                   | <b>0.010699596</b> | <b>0.232879681</b>                   | <b>0.027647431</b> | <b>1.071655584</b>                   | <b>0.034055965</b> | <b>0.102153428</b> | <b>1.46037E-05</b> | <b>4.40743E-05</b> |



|                     |                 |                          |                    |                    |                    |                    |                    |                    |                    |                    |                    |
|---------------------|-----------------|--------------------------|--------------------|--------------------|--------------------|--------------------|--------------------|--------------------|--------------------|--------------------|--------------------|
|                     |                 | 24-methylenecycloartanol | ND                 | ND                 | ND                 | ND                 | ND                 | ND                 | ND                 | ND                 | ND                 |
|                     | <b>Subtotal</b> |                          | <b>0.012977029</b> | <b>0.001070845</b> | <b>0.003940869</b> | <b>0.00040873</b>  | <b>0.219510436</b> | <b>0.007149749</b> | <b>0.001399743</b> | <b>8.93476E-06</b> | <b>7.25454E-06</b> |
| <b>Unidentified</b> |                 |                          | 0.096697882        | 0.007120985        | 0.395693583        | 0.017589738        | 0.24812657         | 0.003727087        | 9.47942E-05        | 4.67375E-05        | 0.001201081        |
|                     | <b>Subtotal</b> |                          | <b>0.096697882</b> | <b>0.007120985</b> | <b>0.395693583</b> | <b>0.017589738</b> | <b>0.24812657</b>  | <b>0.003727087</b> | <b>9.47942E-05</b> | <b>4.67375E-05</b> | <b>0.001201081</b> |
|                     | <b>Total</b>    |                          | <b>2.010488452</b> | <b>0.086620485</b> | <b>2.734768732</b> | <b>0.15312798</b>  | <b>3.891238138</b> | <b>0.054481803</b> | <b>0.014649765</b> | <b>5.15599E-05</b> | <b>0.002061747</b> |

| The fifth leaf    |                 |     |                                    |                    |                                    |                    |                                    |                    |                    |                    |                    |
|-------------------|-----------------|-----|------------------------------------|--------------------|------------------------------------|--------------------|------------------------------------|--------------------|--------------------|--------------------|--------------------|
|                   |                 |     | D-1                                |                    | D-8                                |                    | D-15                               |                    |                    |                    |                    |
|                   |                 |     | Average( $\mu\text{g}/\text{cm}$ ) | SE                 | Average( $\mu\text{g}/\text{cm}$ ) | SE                 | Average( $\mu\text{g}/\text{cm}$ ) | SE                 | p (D-8 vs D-1)     | p (D-15 vs D-1)    | p (D-15 vs D-8)    |
| <b>Acids</b>      |                 | C16 | 0.053614986                        | 0.005903244        | 0.034804899                        | 0.007301476        | 0.052626871                        | 0.007666428        | 0.115674171        | 0.923574728        | 0.167590134        |
|                   |                 | C18 | 0.055048568                        | 0.006265918        | 0.045836558                        | 0.013001978        | 0.062810518                        | 0.010210504        | 0.558016192        | 0.552350443        | 0.36257548         |
|                   |                 | C20 | ND                                 | ND                 | ND                                 | ND                 | 0.037373369                        | 0.001958706        | ND                 | 4.44497E-05        | 4.44497E-05        |
|                   |                 | C22 | ND                                 | ND                 | ND                                 | ND                 | 0.008398127                        | 0.001690149        | ND                 | 0.007657647        | 0.007657647        |
|                   |                 | C24 | 0.00611376                         | 0.000362788        | 0.007017256                        | 0.00149343         | 0.004541195                        | 0.000963106        | 0.588197988        | 0.201234581        | 0.235947012        |
|                   |                 | C26 | 0.002985804                        | 0.000198467        | 0.003146595                        | 0.000259444        | 0.012468213                        | 0.000852779        | 0.648342738        | 0.000412428        | 0.000472498        |
|                   |                 | C28 | 0.006463793                        | 0.000821515        | 0.016386334                        | 0.001784802        | 0.013111772                        | 0.001643446        | 0.007230199        | 0.022391533        | 0.24844824         |
|                   |                 | C30 | ND                                 | ND                 | 0.03910054                         | 0.003399741        | 0.025242404                        | 0.001208868        | 0.000326307        | 3.10837E-05        | 0.018449122        |
|                   | <b>Subtotal</b> |     | <b>0.124226912</b>                 | <b>0.01213331</b>  | <b>0.146292182</b>                 | <b>0.025698354</b> | <b>0.216572468</b>                 | <b>0.020462812</b> | <b>0.480846103</b> | <b>0.017814563</b> | <b>0.099152312</b> |
| <b>1-Alkanols</b> |                 | C18 | 0.020257389                        | 0.00465226         | 0.025170349                        | 0.007599221        | 0.022523496                        | 0.003036005        | 0.610720672        | 0.704221404        | 0.762560125        |
|                   |                 | C24 | 0.014351331                        | 0.001648277        | 0.02020756                         | 0.003139698        | 0.056089263                        | 0.03448359         | 0.173985691        | 0.293240787        | 0.358615324        |
|                   |                 | C26 | 0.005998025                        | 0.001215098        | 0.002139732                        | 0.000637824        | 0.015117326                        | 0.002609803        | 0.048243443        | 0.033931345        | 0.008458413        |
|                   |                 | C28 | 0.021206787                        | 0.005033873        | 0.043664496                        | 0.003867601        | 0.036073435                        | 0.006216777        | 0.024062884        | 0.136637149        | 0.358392894        |
|                   |                 | C30 | ND                                 | ND                 | ND                                 | ND                 | ND                                 | ND                 | ND                 | ND                 | ND                 |
|                   |                 | C32 | 0.081534841                        | 0.013338789        | 0.105915028                        | 0.008198972        | 0.080522867                        | 0.003575271        | 0.194432274        | 0.945101202        | 0.046923268        |
|                   |                 | C34 | ND                                 | ND                 | ND                                 | ND                 | ND                                 | ND                 | ND                 | ND                 | ND                 |
|                   | <b>Subtotal</b> |     | <b>0.143348373</b>                 | <b>0.021450246</b> | <b>0.197097166</b>                 | <b>0.004814927</b> | <b>0.210326388</b>                 | <b>0.028929166</b> | <b>0.070832989</b> | <b>0.136435817</b> | <b>0.675296903</b> |
| <b>Aldehydes</b>  |                 | C26 | 0.00631801                         | 0.000223522        | 0.008761163                        | 0.001894388        | 0.007423927                        | 0.001438528        | 0.269485766        | 0.489761644        | 0.604004585        |
|                   |                 | C28 | 0.004497763                        | 0.000305692        | 0.004995349                        | 0.000102331        | 0.003681158                        | 0.000763565        | 0.197572625        | 0.3769808          | 0.163227764        |
|                   |                 | C30 | 0.015232574                        | 0.002457038        | 0.01798273                         | 0.001401328        | 0.008603024                        | 0.000943993        | 0.385966782        | 0.065447901        | 0.00515227         |
|                   | <b>Subtotal</b> |     | <b>0.026048346</b>                 | <b>0.002254222</b> | <b>0.031739242</b>                 | <b>0.002916473</b> | <b>0.01970811</b>                  | <b>0.003094641</b> | <b>0.197495777</b> | <b>0.173061036</b> | <b>0.047379672</b> |
| <b>Alkanes</b>    |                 | C17 | ND                                 | ND                 | ND                                 | ND                 | 0.018621144                        | 0.003301551        | ND                 | 0.004864667        | 0.004864667        |
|                   |                 | C19 | ND                                 | ND                 | ND                                 | ND                 | 0.034228107                        | 0.003925297        | ND                 | 0.000952709        | 0.000952709        |

|                          |  |                 |                    |                    |                    |                    |                    |                    |                    |                    |                    |
|--------------------------|--|-----------------|--------------------|--------------------|--------------------|--------------------|--------------------|--------------------|--------------------|--------------------|--------------------|
|                          |  | C21             | 0.03155043         | 0.001312267        | 0.03327211         | 0.005287769        | 0.087835045        | 0.003394007        | 0.767796894        | 0.000101965        | 0.000967962        |
|                          |  | C25             | 0.029973189        | 0.001271147        | 0.031668191        | 0.002317966        | 0.125660718        | 0.006890988        | 0.556307296        | 0.000166552        | 0.000206482        |
|                          |  | C27             | 0.018780368        | 0.000883492        | 0.017912453        | 0.000560907        | 0.104071165        | 0.004827944        | 0.453533165        | 6.43686E-05        | 5.94964E-05        |
|                          |  | C29             | 0.037598229        | 0.003274145        | 0.055597952        | 0.009384055        | 0.172599954        | 0.011082535        | 0.144371111        | 0.000306981        | 0.001288624        |
|                          |  | C31             | 0.012349861        | 0.000695295        | 0.019404176        | 0.008252323        | 0.074327291        | 0.007046581        | 0.442314051        | 0.000939009        | 0.007173813        |
|                          |  | C35             | 0.02099458         | 0.00281011         | 0.02459069         | 0.001832231        | 0.073338075        | 0.004756282        | 0.344101928        | 0.000692242        | 0.000667717        |
|                          |  | C37             | ND                 | ND                 | ND                 | ND                 | 0.04643036         | 0.004579479        | ND                 | 0.000532787        | 0.000532787        |
|                          |  | C39             | ND                 | ND                 | ND                 | ND                 | 0.024072547        | 0.001808213        | ND                 | 0.000184035        | 0.000184035        |
|                          |  | <b>Subtotal</b> | <b>0.151246656</b> | <b>0.009711451</b> | <b>0.182445572</b> | <b>0.01901734</b>  | <b>0.761184405</b> | <b>0.047718736</b> | <b>0.217794171</b> | <b>0.000233766</b> | <b>0.000353623</b> |
| <b>1-Alkanol sesters</b> |  | C22             | 0.038907483        | 0.001971861        | 0.026303277        | 0.002382392        | 0.054260514        | 0.006663471        | 0.015152652        | 0.091692135        | 0.016808358        |
| <b>Glycol esters</b>     |  | C18             | 0.031460622        | 0.008440655        | 0.043084799        | 0.010966991        | 0.055296874        | 0.012725595        | 0.448206672        | 0.193558898        | 0.507523837        |
|                          |  | C19             | 0.036853964        | 0.006348706        | 0.040076405        | 0.007848012        | 0.132834752        | 0.005070123        | 0.76552841         | 0.000293897        | 0.000577994        |
|                          |  | C21             | 0.021539286        | 0.004252685        | 0.019380037        | 0.004310131        | 0.023140535        | 0.004134502        | 0.73940088         | 0.800539739        | 0.563109305        |
| <b>Benzyl esters</b>     |  | C25             | ND                 | ND                 | ND                 | ND                 | ND                 | ND                 | ND                 | ND                 | ND                 |
|                          |  | C27             | ND                 | ND                 | ND                 | ND                 | ND                 | ND                 | ND                 | ND                 | ND                 |
|                          |  | C29             | ND                 | ND                 | ND                 | ND                 | ND                 | ND                 | ND                 | ND                 | ND                 |
| <b>Phenethyl esters</b>  |  | C28             | ND                 | ND                 | ND                 | ND                 | ND                 | ND                 | ND                 | ND                 | ND                 |
| <b>Phthalate esters</b>  |  | C16             | 0.005079203        | 0.000676348        | 0.007636508        | 0.001165965        | 0.008794845        | 0.001220949        | 0.130659368        | 0.056268178        | 0.530342016        |
|                          |  | C16             | 0.019143939        | 0.000235022        | 0.014710678        | 0.00283488         | 0.010536967        | 0.002450973        | 0.194122309        | 0.024995126        | 0.327803746        |
|                          |  | C24             | 0.038829276        | 0.002285654        | 0.028465393        | 0.012863705        | 0.126192716        | 0.000812423        | 0.472033544        | 3.54801E-06        | 0.00162275         |
|                          |  | C24             | 0.032201418        | 0.001591422        | 0.026404948        | 0.003054389        | 0.026059841        | 0.006094457        | 0.167662181        | 0.384752233        | 0.96205205         |
|                          |  | <b>Subtotal</b> | <b>0.224015192</b> | <b>0.020480234</b> | <b>0.206062044</b> | <b>0.015899074</b> | <b>0.437117045</b> | <b>0.033704248</b> | <b>0.526757682</b> | <b>0.005679489</b> | <b>0.003441469</b> |
| <b>Glycols</b>           |  | C16             | 0.182569197        | 0.013922075        | 0.119741781        | 0.014378932        | 0.136355455        | 0.023267687        | 0.034877816        | 0.163514239        | 0.576378431        |
|                          |  | C18             | 0.013740964        | 0.00218023         | 0.009283678        | 0.000837133        | 0.025422905        | 0.001480682        | 0.128960118        | 0.011399515        | 0.000688473        |
|                          |  | C20             | 0.019658442        | 0.003104398        | 0.027445003        | 0.002934383        | 0.022625559        | 0.002863742        | 0.142412943        | 0.521086485        | 0.305015507        |
|                          |  | C22             | 0.045140195        | 0.003602856        | 0.039449694        | 0.003708329        | 0.013814789        | 0.001847284        | 0.332848313        | 0.001503139        | 0.00346731         |
|                          |  | C24             | ND                 | ND                 | ND                 | ND                 | 0.135317083        | 0.004072946        | ND                 | 4.89505E-06        | 4.89505E-06        |
|                          |  | <b>Subtotal</b> | <b>0.261108798</b> | <b>0.017151755</b> | <b>0.195920155</b> | <b>0.021092151</b> | <b>0.333535792</b> | <b>0.023185461</b> | <b>0.074525646</b> | <b>0.065963404</b> | <b>0.011778041</b> |
| <b>Tocopherols</b>       |  | γ-Tocopherole   | ND                 | ND                 | ND                 | ND                 | ND                 | ND                 | ND                 | ND                 | ND                 |
|                          |  | β-Tocopherole   | 0.009629117        | 0.002680511        | 0.004941127        | 0.000559712        | 0.009458363        | 0.000987901        | 0.162062109        | 0.955204273        | 0.016423089        |
|                          |  | <b>Subtotal</b> | <b>0.009629117</b> | <b>0.002680511</b> | <b>0.004941127</b> | <b>0.000559712</b> | <b>0.009458363</b> | <b>0.000987901</b> | <b>0.162062109</b> | <b>0.955204273</b> | <b>0.016423089</b> |
| <b>Triterpenoids</b>     |  | α-Amyrin        | 0.029597907        | 0.005789446        | 0.02547402         | 0.001458906        | 0.023014925        | 0.002533893        | 0.527733787        | 0.356383846        | 0.447664061        |
|                          |  | β-Amyrin        | 0.511438057        | 0.054919778        | 0.01936505         | 0.002178569        | 0.399877727        | 0.033432106        | 0.00086105         | 0.157734626        | 0.000342682        |
|                          |  | β-Amyrone       | ND                 | ND                 | 0.106404879        | 0.015531943        | 0.053519213        | 0.004976587        | 0.002376318        | 0.000423848        | 0.031596653        |
|                          |  | Lupeol          | 0.01468671         | 0.002585584        | 0.019330554        | 0.005959334        | 0.007583102        | 0.000755502        | 0.514194526        | 0.057754213        | 0.122167333        |
|                          |  | Ursolic acid    | 0.026602901        | 0.006638694        | 0.019919969        | 0.000465815        | 0.019885171        | 0.000428166        | 0.372103859        | 0.369711053        | 0.958776245        |
|                          |  | Friedelin       | 0.562646918        | 0.005029885        | 0.765187392        | 0.085090296        | 0.375529224        | 0.018595943        | 0.076308026        | 0.000628946        | 0.011042701        |

|                     |                 |                          |                    |                    |                    |                    |                    |                    |                    |                    |                    |
|---------------------|-----------------|--------------------------|--------------------|--------------------|--------------------|--------------------|--------------------|--------------------|--------------------|--------------------|--------------------|
|                     |                 | Canophyllol              | ND                 | ND                 | ND                 | ND                 | 0.184686899        | 0.011010266        | ND                 | 7.40249E-05        | 7.40249E-05        |
|                     |                 | Betulin                  | 0.012266315        | 0.001292928        | 0.451139512        | 0.052978645        | 0.263175905        | 0.012168485        | 0.001160477        | 3.34136E-05        | 0.02586789         |
|                     | <b>Subtotal</b> |                          | <b>1.157238807</b> | <b>0.045563695</b> | <b>1.406821376</b> | <b>0.146944758</b> | <b>1.327272165</b> | <b>0.049053182</b> | <b>0.180062966</b> | <b>0.064000128</b> | <b>0.634664326</b> |
| <b>Steroids</b>     |                 | Campesterol              | 0.035082644        | 0.004928747        | 0.036705122        | 0.005228402        | 0.022606288        | 0.002722012        | 0.832421573        | 0.091028979        | 0.075016997        |
|                     |                 | Stigmasterol             | 0.020902733        | 0.002188985        | 0.004766319        | 0.000275274        | 0.032705376        | 0.005703167        | 0.001858873        | 0.125517181        | 0.008083586        |
|                     |                 | β-Sitosterol             | ND                 | ND                 | ND                 | ND                 | 0.110983255        | 0.007848096        | ND                 | 0.000145157        | 0.000145157        |
|                     |                 | Lanosterol               | 0.013714633        | 0.000338978        | 0.021152077        | 0.002068654        | 0.01366026         | 0.000954594        | 0.023841649        | 0.959767509        | 0.03026211         |
|                     |                 | 24-methylenecycloartanol | 0.002605286        | 0.000191201        | 0.003311837        | 0.000992633        | 0.017005405        | 0.002021744        | 0.523092579        | 0.002088486        | 0.003698659        |
|                     | <b>Subtotal</b> |                          | <b>0.072305297</b> | <b>0.002960096</b> | <b>0.065935355</b> | <b>0.007603998</b> | <b>0.196960584</b> | <b>0.017665213</b> | <b>0.487410404</b> | <b>0.00227862</b>  | <b>0.00242613</b>  |
| <b>Unidentified</b> |                 |                          | 1.34469464         | 0.034405859        | 1.444171487        | 0.121401102        | 0.847788427        | 0.02411144         | 0.474582326        | 0.00029254         | 0.008533027        |
|                     | <b>Subtotal</b> |                          | <b>1.34469464</b>  | <b>0.034405859</b> | <b>1.444171487</b> | <b>0.121401102</b> | <b>0.847788427</b> | <b>0.02411144</b>  | <b>0.474582326</b> | <b>0.00029254</b>  | <b>0.008533027</b> |
|                     | <b>Total</b>    |                          | <b>3.513862139</b> | <b>0.082507194</b> | <b>3.881425707</b> | <b>0.281313686</b> | <b>4.359923746</b> | <b>0.075575075</b> | <b>0.278197937</b> | <b>0.001639351</b> | <b>0.175790838</b> |
